# Supplementary material for: Impact of Analytical Treatment Interruption on Burden and Diversification of HIV Peripheral Reservoir: A Pilot Study
Source: MDPI journal article supplement (doi:10.3390/v13071403), 2021-07-19
Supplement: s1 [file s1]

**Table S1. NGS primers used to sequencing HIV-1**

| <b>Amplicon</b>        | <b>Primers</b> | <b>Primer Sequences</b>        | <b>HXB2 Nucleotide Positions</b> |
|------------------------|----------------|--------------------------------|----------------------------------|
| <b>POL Region</b>      |                |                                |                                  |
| 1                      | Forward- 1F    | 5'-AGACAGGCTAATTTTTTAGGGA-3'   | 2070-2095                        |
|                        | Reverse- 1R    | 5'-CCAATTATGTTGACAGGTGTAGG-3'  | 2509-2487                        |
| 2                      | Forward -2F    | 5'CAGGAGCAGATGATACAGTATTAGA-3' | 2329-2353                        |
|                        | Reverse-2R     | 5'-ATGGATTTTCAGGCCCAATTTT-3'   | 2715-2694                        |
| 3                      | Forward-3F     | 5'-TTAAAGCCAGGAATGGATGG-3'     | 2583-2602                        |
|                        | Reverse-3R     | 5'-GGCTCTAAGATTTTGTTCATGC-3'   | 3058-3057                        |
| 4                      | Forward-4F     | 5'-TGGGAAGTTCAATTAGGAAT-3'     | 2811-2830                        |
|                        | Reverse-4R     | 5'-AGGCTGTACTGTCCATT-3'        | 3278-3262                        |
| 5                      | Forward-5F     | 5'-GCATGACAAAAATCTTAGAGC-3'    | 2037-3057                        |
|                        | Reverse-5R     | 5'-TAAGTCTTTTGATGGGTCA-3'      | 3524-3506                        |
| <b>C2-V3-C3 region</b> |                |                                |                                  |
| 1                      | Forward-S      | 5'-GTTAAATGGCAGTCTAGCAG-3'     | 7004-7023                        |
|                        | Reverse-AS1    | 5'-GAAAAATTCCCCTCCACAATT-3'    | 7353-7373                        |
